# Supplementary material for: Single-Cell RNA-Sequencing and Metabolomics Analyses Reveal the Contribution of Perivascular Adipose Tissue Stem Cells to Vascular Remodeling
Source: PubMed Central journal article supplement (PMC6766361; doi:10.1161/atvbaha.119.312732), 2019-07-25
Supplement: atv-39-2049-s001.pdf [file atv-39-2049-s001.pdf]

## Major Resources Tables

### Animals (in vivo studies)

| Species                            | Vendor or Source                                                           | Background Strain     | Sex             |
|------------------------------------|----------------------------------------------------------------------------|-----------------------|-----------------|
| Mouse (wt)                         | Jackson Laboratory                                                         | C57BL/6               | Male            |
| Mouse (129SvEv/C57BL/6/mir-378-KO) | Dr. Eric Olson (University Texas Southwestern Medical Centre, Dallas, USA) | C57Bl/10ScSn-Dmdmdx/J | Male and Female |

### Antibodies: WB: Western Blot, IF: immunofluorescent staining, FC: flow cytometry

| Target antigen            | Vendor or Source | Catalog #   | Working dilution                |
|---------------------------|------------------|-------------|---------------------------------|
| anti-CD45-APC             | BD Biosciences   | 561018      | FC: 0.5 µg/ml                   |
| anti-CD29-PE              | BD Biosciences   | 562801      | FC: 0.5 µg/ml                   |
| anti-Sca-1-PE-Cy7         | Biolegend        | 108113      | FC: 0.5 µg/ml                   |
| anti-CD31-PerCP           | Biolegend        | 201419      | FC: 0.5 µg/ml                   |
| anti-CDH5-Alexa Fluor 647 | BD Biosciences   | 562242      | FC: 0.5 µg/ml                   |
| anti-PDGFRa-APC           | eBioscience      | 17-1401-81  | FC: 0.5 µg/ml                   |
| anti-CD117-PE             | Biolegend        | 105807      | FC: 0.5 µg/ml                   |
| anti-CD34-APC             | Biolegend        | 128611      | FC: 0.5 µg/ml                   |
| anti-CD44-PerCP           | Biolegend        | 103035      | FC: 0.5 µg/ml                   |
| anti-CD11b-PE             | Biolegend        | 101205      | FC: 0.5 µg/ml                   |
| anti-FABP4                | Abcam            | ab92501     | IF: 1 µg/ml                     |
| anti-OPN                  | R&D systems      | AF808       | IF: 1 µg/ml                     |
| anti-PLIN1                | Abcam            | ab3526      | IF: 5 µg/ml                     |
| anti-CD31-AlexaFluor 647  | Biolegend        | 102516      | IF: 2.5 µg/ml                   |
| anti-Sca-1                | Abcam            | ab51317     | IF: 5 µg/ml                     |
| anti-CD29                 | R&D Systems      | AF2405-SP   | IF: 1 µg/ml                     |
| anti-CNN1                 | Abcam            | ab46794     | WB: 0.05 µg/ml<br>IF: 0.2 µg/ml |
| anti-TAGLN                | Abcam            | ab14106     | WB: 0.5 µg/ml<br>IF: 2 µg/ml    |
| anti-ACTA2                | Sigma            | 2547-100    | WB: 2X10 <sup>-6</sup> M        |
| anti-ACTA2                | Sigma            | C6198-2ML   | IF: 2X10 <sup>-5</sup> M        |
| anti-ACTA2                | Abcam            | ab184675    | IF: 2.5 µg/ml                   |
| anti-TGFb1                | Abcam            | ab92486     | WB: 0.5 µg/ml<br>IF: 5 µg/ml    |
| anti-RFP                  | Rockland         | 600-401-379 | IF: 5 µg/ml                     |

### Q-PCR primers

| Gene Symbol  | Species | Sequence (5'→3')                                                    |
|--------------|---------|---------------------------------------------------------------------|
| <i>Acta2</i> | Mouse   | F: 5'-TCAGGGAGTAATGGTTGGAATG-3'<br>R: 5'-GGTGATGATGCCGTGTTCTA-3'    |
| <i>Bglap</i> | Mouse   | F: 5'-GCAATAAGGTAGTGAACAGACTCC-3'<br>R: 5'-GTTTGTAGGCGGTCTTCAAGC-3' |
| <i>Cebpa</i> | Mouse   | F: 5'-ATACTCAAACACTCGCTCCTTTTCC-3'                                  |

|               |       |                                                                            |
|---------------|-------|----------------------------------------------------------------------------|
|               |       | R: 5'-GGATCTCAGCTTCCTGTATCTTCC-3'                                          |
| <i>Cebpb</i>  | Mouse | F: 5'-GTAATCACTTAAAGATGTTTCCTGCGG-3'<br>R: 5'-ACTTTAATGCTCGAAACGGAAAAGG-3' |
| <i>Cebpd</i>  | Mouse | F: 5'-CCTTCTACGAGCCAGGCAGG-3'<br>R: 5'-GTCAATGTAGGCGCTGAAGTCG-3'           |
| <i>Cnn1</i>   | Mouse | F: 5'-GGTCCTGCCTACGGCTTGTC-3'<br>R: 5'-TCGCAAAGAATGATCCCGTC-3'             |
| <i>Cpt1a</i>  | Mouse | F: 5'-CTCCGCTCGCTCATTCC-3'<br>R: 5'-TGCCATTCTTGAATCGGATG-3'                |
| <i>Cpt1b</i>  | Mouse | F: 5'-ATGGTGGGCAACTAATATGT-3'<br>R: 5'-AGTTTGC GGCGATACATGA-3'             |
| <i>Crat</i>   | Mouse | F: 5'-AAGAAAATGGAGA ACTGGCTGTCC-3'<br>R: 5'-ACCCTCGATGAGTTTGGCAGC-3'       |
| <i>Fabp4</i>  | Mouse | F: 5'-TGTCTCCAGTGAAA ACTTCG-3'<br>R: 5'-TGACCAAATCCCCATTTACG-3'            |
| <i>Ppara</i>  | Mouse | F: 5'-TACTGCCGTTTTT CACAAGTGC-3'<br>R: 5'-AGGTCGTGTT CACAGGTAAGA-3'        |
| <i>Ppard</i>  | Mouse | F: 5'-GAAGAGGAGAAAGAGGAAGTGGC-3'<br>R: 5'-GAGGAAGGGGAGGAATTCTGG-3'         |
| <i>Pparg</i>  | Mouse | F: 5'-GTGATCTTAACTGCCGATCCAC-3'<br>R: 5'-CTCTGGGTT CAGCTGGTCGATA-3'        |
| <i>Prdm16</i> | Mouse | F: 5'-AAGAAAATGGAGA ACTGGCTGTCC-3'<br>R: 5'-ACCCTCGATGAGTTTGGCAGC-3'       |
| <i>Runx2</i>  | Mouse | F: 5'-ACAGTCTT CACAAATCCTCC-3'<br>R: 5'-GACACCTACTCTCATACTGG-3'            |
| <i>Tagln</i>  | Mouse | F: 5'-GATATGGCAGCAGTGCAGAG-3'<br>R: 5'-AGTTGGCTGTCTGTGAAGTC-3'             |
| <i>Tgfb1</i>  | Mouse | F: 5'-CCACCTGCAAGACCATCGAC-3'<br>R: 5'-CTGGCGAGCCTTAGTTTGGAC-3'            |
| <i>Ucp1</i>   | Mouse | F: 5'-CCATGTACACCAAGGAAGGACC-3'<br>R: 5'-CAAGTTGCTTATGTGGTACAATCC-3'       |
